# Supplementary material
Source: HighWire-hosted journal article supplement (https://bmjopen.bmj.com/content/15/1/e092380)
Supplement: inline-supplementary-material-5 [file inline-supplementary-material-5.pdf]

**Table S5.** Characteristics of the interventions of the 20 included studies.

| Author,<br>Year      | Intervention Details                                                                                                                                                   | Interventionist<br><br>Mode of Intervention         | Target Population                                          | Data Collection Methods<br><br>Duration                                                               |
|----------------------|------------------------------------------------------------------------------------------------------------------------------------------------------------------------|-----------------------------------------------------|------------------------------------------------------------|-------------------------------------------------------------------------------------------------------|
| Agaku et al., 2020   | Comparisons of states with and without comprehensive clean indoor air laws. Includes laws covering both tobacco cigarettes and e-cigarette or tobacco cigarettes only. | USA state governments<br><br>NA                     | Never tobacco users<br>Grades 6 to 12                      | School-based questionnaire administered 2016 – 2017<br><br>NA                                         |
| Astor et al., 2019   | Local tobacco retail licensing regulation restricting access of tobacco products to minors.                                                                            | Government of California, USA<br><br>NA             | Grades 11 and 12                                           | Self-administered, online questionnaire<br>Baseline: 2014<br>Follow-up: Jan 2015 – Jun 2016<br><br>NA |
| Boynton et al., 2023 | 220 vaping prevention messages developed by public health organizations in the USA.                                                                                    | Public health agencies across the USA<br><br>Online | Ages 13 to 17                                              | Online questionnaire conducted between Oct – Dec 2020<br><br>NA                                       |
| Cai & Zhao, 2023     | Receive either gain-or-loss framed text messages regarding harms of vaping on smartphones (8 messages in each frame).                                                  | Research group<br><br>Virtual (text messaging via   | Ages 13 to 17 years<br>Youth who had not taken part in any | Pre- and post-online questionnaire<br><br>Not specified                                               |

|                                |                                                                                                                                                                                                                                                                     |                                                                      |                                                                                           |                                                                                             |
|--------------------------------|---------------------------------------------------------------------------------------------------------------------------------------------------------------------------------------------------------------------------------------------------------------------|----------------------------------------------------------------------|-------------------------------------------------------------------------------------------|---------------------------------------------------------------------------------------------|
|                                |                                                                                                                                                                                                                                                                     | smartphone)                                                          | research on tobacco in the last 180 days and were considered susceptible to future vaping |                                                                                             |
| Cartujano-Barrera et al., 2022 | Participants received one of four types of graphic messages (health rewards, financial rewards, autonomy, or social norms). Messages were provided in both English and Spanish and were designed using qualitative user-centered design methods.                    | Research group<br><br>Online                                         | Ages 12 to 17<br><br>Black or Latino adolescents who had never used e-cigarettes          | Pre- and post-online questionnaire<br><br>Not specified                                     |
| Chaplin et al., 2020           | A 50-minute educational presentation developed by pharmacy students. The presentation included: description of change theory, resources to support behaviour change, visual aids, informational videos, and opportunities for the audience to actively participate. | Research group<br><br>In classrooms (delivered by pharmacy students) | Grades 9 to 12                                                                            | Pre- and post-intervention paper-based questionnaire<br><br>50-minute one time presentation |
| Choi et al., 2022              | Setting the minimum age for sale of tobacco products (including e-cigarettes) to 21, adding excise taxes to the sale of e-cigarettes, and adding e-cigarettes to smoke-free policies.                                                                               | USA state governments<br><br>NA                                      | Grades 9 to 12                                                                            | Online questionnaire (conducted every 2 years)<br><br>NA                                    |
| Gaiha et                       | Based on the Stanford Tobacco Prevention                                                                                                                                                                                                                            | Research group                                                       | Grades 6 to                                                                               | Pre- and post-intervention paper-                                                           |

|                     |                                                                                                                                                                                                                                                                                                                                                                                                                            |                                                                                      |                     |                                                                                                                                                    |
|---------------------|----------------------------------------------------------------------------------------------------------------------------------------------------------------------------------------------------------------------------------------------------------------------------------------------------------------------------------------------------------------------------------------------------------------------------|--------------------------------------------------------------------------------------|---------------------|----------------------------------------------------------------------------------------------------------------------------------------------------|
| al., 2021           | Toolkit, delivery of a 30-minute educational session by a physician or public health professional. The session provided information on e-cigarette types, contents of e-cigarettes, marketing and advertising, health effects of usage, and information on nicotine addiction. Available at: <a href="https://med.stanford.edu/tobaccoprevention toolkit.html">https://med.stanford.edu/tobaccoprevention toolkit.html</a> | During health education classes                                                      | 12                  | based questionnaire<br><br>30-minute one time presentation                                                                                         |
| Grube et al., 2022  | Increasing the minimum age to 21 years for the purchase of tobacco (including electronic cigarettes).                                                                                                                                                                                                                                                                                                                      | Government of California, USA<br><br>NA                                              | Grades 7, 9, and 11 | Successive cross-sectional surveys<br><br>NA                                                                                                       |
| Hwang & Cho, 2020   | Inclusion of health warning labels on tobacco products (including electronic cigarettes). Warning labels included ten themes related to different types of cancers and coronary diseases caused by tobacco usage; dangers of secondhand smoke and smoking during pregnancy; and warnings about impotence, skin aging, and premature death.                                                                                 | Government<br><br>Printed graphic health warning labels on tobacco products          | Grades 7 to 12      | Online questionnaire (completed in schools)<br><br>NA                                                                                              |
| Kelder et al., 2020 | An educational program with four interactive modules completed in the classroom and delivered by teachers (classroom and physical education), student-peer leaders, and social messaging in the schools (e.g., promotional posters). Available at: <a href="https://catch.org">CATCH.org</a>                                                                                                                               | Research group<br><br>Classroom setting and through social messaging (e.g., posters) | Grade 6             | Questionnaires administered during physical education class at baseline, 4 months, and 16 months follow-up<br><br>Four 25-minute classroom lessons |

|                        |                                                                                                                                                                                                                                                                                                                        |                                                                                                                |                                                                        |                                                                                                                                     |
|------------------------|------------------------------------------------------------------------------------------------------------------------------------------------------------------------------------------------------------------------------------------------------------------------------------------------------------------------|----------------------------------------------------------------------------------------------------------------|------------------------------------------------------------------------|-------------------------------------------------------------------------------------------------------------------------------------|
|                        |                                                                                                                                                                                                                                                                                                                        | throughout the school                                                                                          |                                                                        |                                                                                                                                     |
| Kowitt et al., 2023    | In a mock website selling e-cigarettes, participants saw three of six different e-cigarette product label options. Product labels were adjusted to include or exclude the word nicotine, and include the source of the product (i.e., tobacco-free, synthetic, or absent).                                             | Research group<br><br>Mock shopping website (online)                                                           | Ages 13 to 17                                                          | Online questionnaire<br><br>16-minutes to complete                                                                                  |
| Li et al., 2023        | E-cigarette health warning exposure <i>at baseline</i> and rules at home about a smoke-free environment <i>at baseline</i> .                                                                                                                                                                                           | Not specified<br><br>Health warnings printed on e-cigarette packaging and family imposed smoke-free home rules | Ages 12 to 17<br><br>Youth who had never used e-cigarettes at baseline | Online questionnaire<br><br>NA                                                                                                      |
| McCauley et al., 2023  | Delivery of a 35-minute vaping-prevention curriculum (including interactive questions and activities) instructed by a community health nurse during students' English class. Available at: <a href="https://med.stanford.edu/tobaccopreventiontoolkit.html">https://med.stanford.edu/tobaccopreventiontoolkit.html</a> | Community health nurse<br><br>During English class                                                             | Grades 9 to 12                                                         | Online questionnaire before and after intervention (approximately 50 minutes apart)<br><br>35-minute one-time prevention curriculum |
| Merrill & Hanson, 2022 | Free, online education program (approximately one-hour to complete) with five modules designed to be used in health                                                                                                                                                                                                    | Schools, school boards, and local health unit                                                                  | Ages 10 to 18                                                          | Online pre- and post-test questionnaire                                                                                             |

|                        |                                                                                                                                                                                                                                                                                                                                                                                                                                                  |                                                                     |                                                         |                                                             |
|------------------------|--------------------------------------------------------------------------------------------------------------------------------------------------------------------------------------------------------------------------------------------------------------------------------------------------------------------------------------------------------------------------------------------------------------------------------------------------|---------------------------------------------------------------------|---------------------------------------------------------|-------------------------------------------------------------|
|                        | education classes and to provide age-appropriate information to adolescents about the harmful effects of e-cigarettes. Available at: <a href="https://southwest-utah-public-health-department.thinkific.com/courses/copy-of-clearing-the-vapor">https://southwest-utah-public-health-department.thinkific.com/courses/copy-of-clearing-the-vapor</a> )                                                                                           | Online                                                              |                                                         | 1 hour to complete modules                                  |
| Moore et al., 2023     | The Tobacco Products Directive implemented in the European Union included a mandatory declaration of new products six months prior to their introduction, bans on advertising between countries, the inclusion of health warning labels about nicotine on e-cigarette products, and e-cigarette product strength limitations.                                                                                                                    | European Parliament and the Council of the European Union<br><br>NA | Ages 13 to 15                                           | School-based questionnaires (collected regularly)<br><br>NA |
| Valentine et al., 2019 | Comparison of municipalities with and without smoke-free ordinances. Rules at home about a smoke-free environment.                                                                                                                                                                                                                                                                                                                               | USA municipal governments<br><br>NA                                 | Grades 9 to 12                                          | Paper-based questionnaires<br><br>NA                        |
| Walker et al., 2022    | Youth were randomly assigned to a control group (that saw no public health advertisement for Electronic Nicotine Delivery Systems [ENDS]) or to a viewing group (which saw a single public health advertisement for ENDS). The advertisement was framed around there being an epidemic that causes negative health effects.<br><br>Available at: <a href="https://www.youtube.com/c/TheRealCost/vi">https://www.youtube.com/c/TheRealCost/vi</a> | USA Food and Drug Administration<br><br>Pre-existing panel database | Ages 12 to 17<br>Never-tryers or experimenter s of ENDS | Online questionnaire<br><br>Not specified                   |

|                       |                                                                                                                                                                                                                                                                                                        |                                     |                                                                                         |                                                                                                                                                 |
|-----------------------|--------------------------------------------------------------------------------------------------------------------------------------------------------------------------------------------------------------------------------------------------------------------------------------------------------|-------------------------------------|-----------------------------------------------------------------------------------------|-------------------------------------------------------------------------------------------------------------------------------------------------|
|                       | <a href="#">deos</a> )                                                                                                                                                                                                                                                                                 |                                     |                                                                                         |                                                                                                                                                 |
| Williams et al., 2022 | A range (n=24) of in-person (delivered in classrooms) and online prevention and cessation programs for e-cigarettes were developed. Programs included natural experiments, presentations, interactive displays, and theme weeks.                                                                       | Schools<br><br>In-person and online | Grades 9 to 11<br><br>Students who reported having never tried e-cigarettes at baseline | Pre- and post-intervention paper-based questionnaires and school policies/programs questionnaires sent to schools<br><br>Implemented since 2018 |
| Wyman et al., 2021    | Peer leaders participated in a four-hour workshop to learn how relationships can prevent usage, why vaping should be avoided, and facts about vaping. Peer leaders then developed and delivered content on youth vaping prevention through four school-wide campaigns and informal peer communication. | Research Group<br><br>In-person     | Grade 8                                                                                 | Web-based assessments and social network analyses<br><br>Approximately 12 to 16 weeks                                                           |
